# Supplementary material for: Nerve growth factor receptor (Ngfr) induces neurogenic plasticity by suppressing reactive astroglial Lcn2/Slc22a17 signaling in Alzheimer’s disease
Source: PubMed Central journal article supplement (PMC10333226; doi:10.1038/s41536-023-00311-5), 2023-07-10
Supplement: 41536_2023_311_MOESM3_ESM.pdf [file 41536_2023_311_MOESM3_ESM.pdf]

# **Ngfr induces neurogenic plasticity by suppressing reactive astroglial Lcn2/Slc22a17 signaling in Alzheimer's disease**

Tohid Siddiqui, Mehmet I. Cosacak, Stanislava Popova, Prabesh Bhattarai, Elanur Yilmaz, Annie J. Lee, Yuhao Min, Xue Wang, Mariet Allen, Özkan İş, Zeynep T. Atasavum, Natalia Rodriguez-Muela, Badri N. Vardarajan, Delaney Flaherty, Andrew F. Teich, Ismael Santa-Maria, Uwe Freudenberg, Carsten Werner, Giuseppe Tosto, Richard Mayeux, Nilüfer Ertekin-Taner, Caghan Kizil

## **Supplementary Information**

Supplementary Figures 1-12 (provided in this PDF file)  
Supplementary Tables 1-2 (provided online as .xlsx files)  
Supplementary Data 1-10 (provided online as .xlsx files)

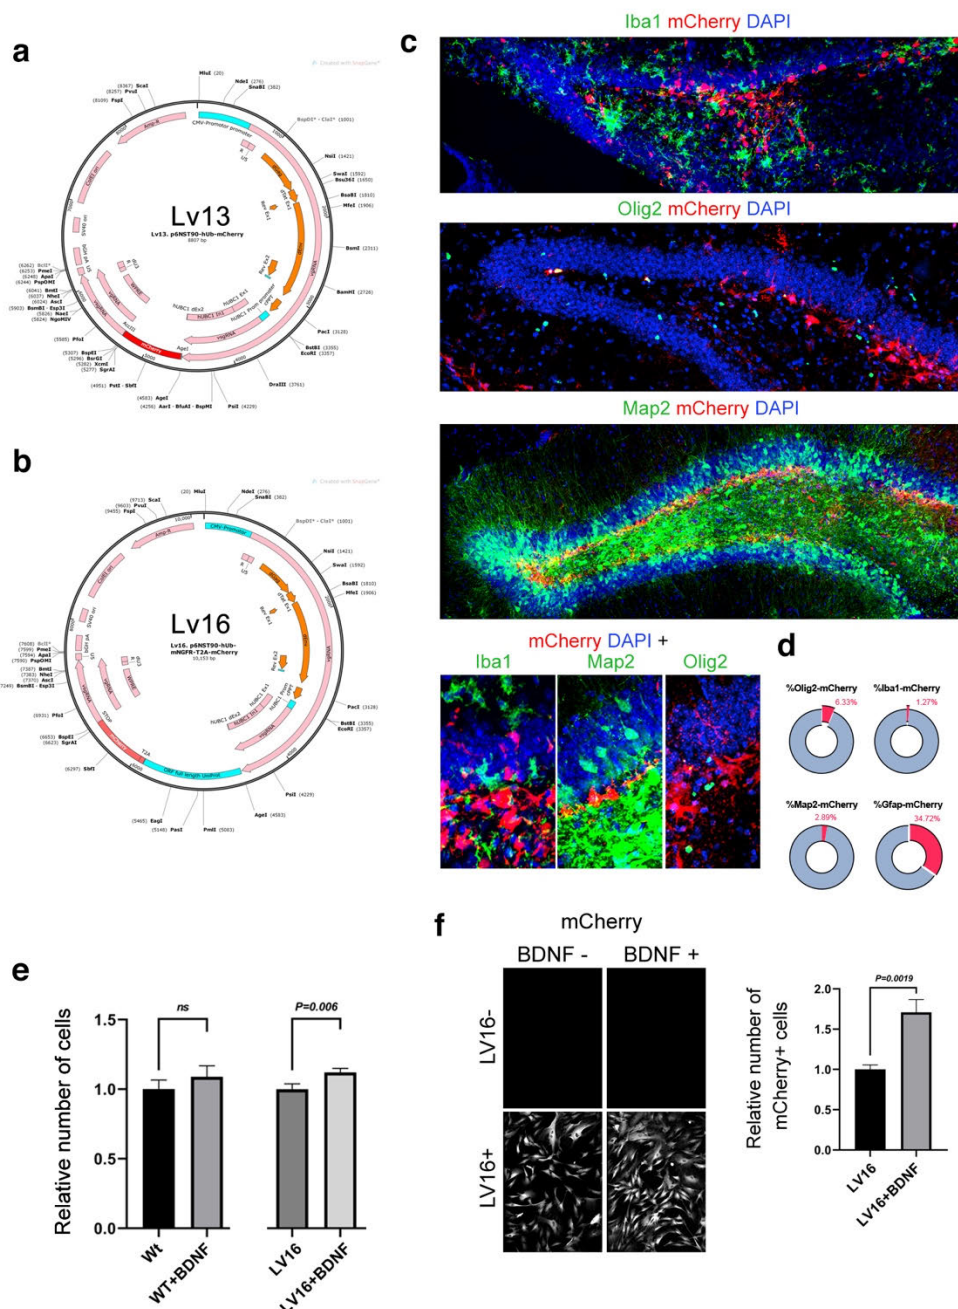

**Supplementary Fig. 1. Maps of lentiviral vectors, in vitro functionality assay, single cell sequencing heat map. a.** Lv13: CMV promoter driven mCherry. **b.** Lv16: CMV promoter-driven mouse Ngfr linked to mCherry with T2A self-cleaving peptide. **c.** Double immunostaining for Iba1 and mCherry for detecting transduced microglia, Olig2 and mCherry for detecting transduced oligodendrocytes, Map2 and mCherry for detecting transduced neurons. **d.** Quantification for percentage of the cell types transduced with Ngfr. **e.** Graphs show relative number of cells in culture dish after equi-number seeding of cells that are either untransduced (wt) or LV16-transduced. **f.** BDNF is added to the culture medium to activate Ngfr signalling. Only Lv16-transduced cells are responsive to BDNF. Staining image shows the mCherry -positive cells that increase in response to BDNF and Lv16. Graph indicates the number of mCherry-positive cells after equi-number seeding. Error bars represent standard error of the means.

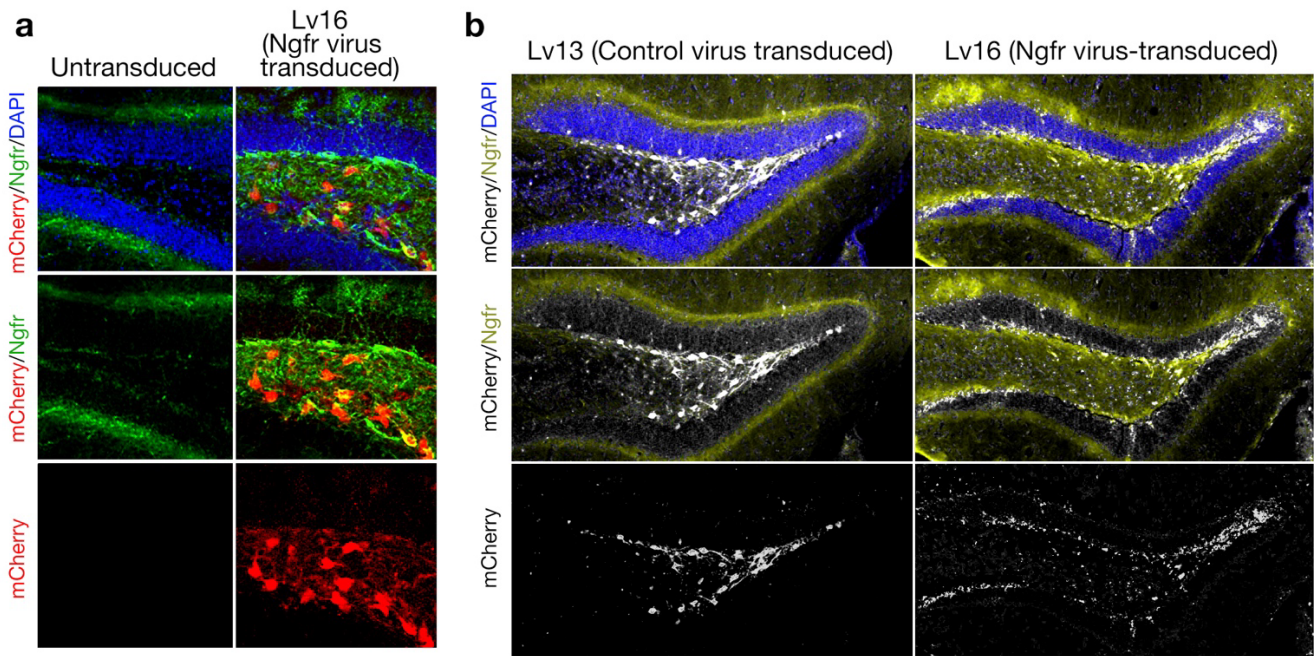

**Supplementary Fig. 2. Single channel images for Ngfr transduction. a.** Ngfr and mCherry immunostaining with DAPI counterstain in untransduced and Lv16-transduced mouse DG. **b.** Ngfr and mCherry immunostaining with DAPI counterstain in Lv13 and Lv16-transduced mouse DG.

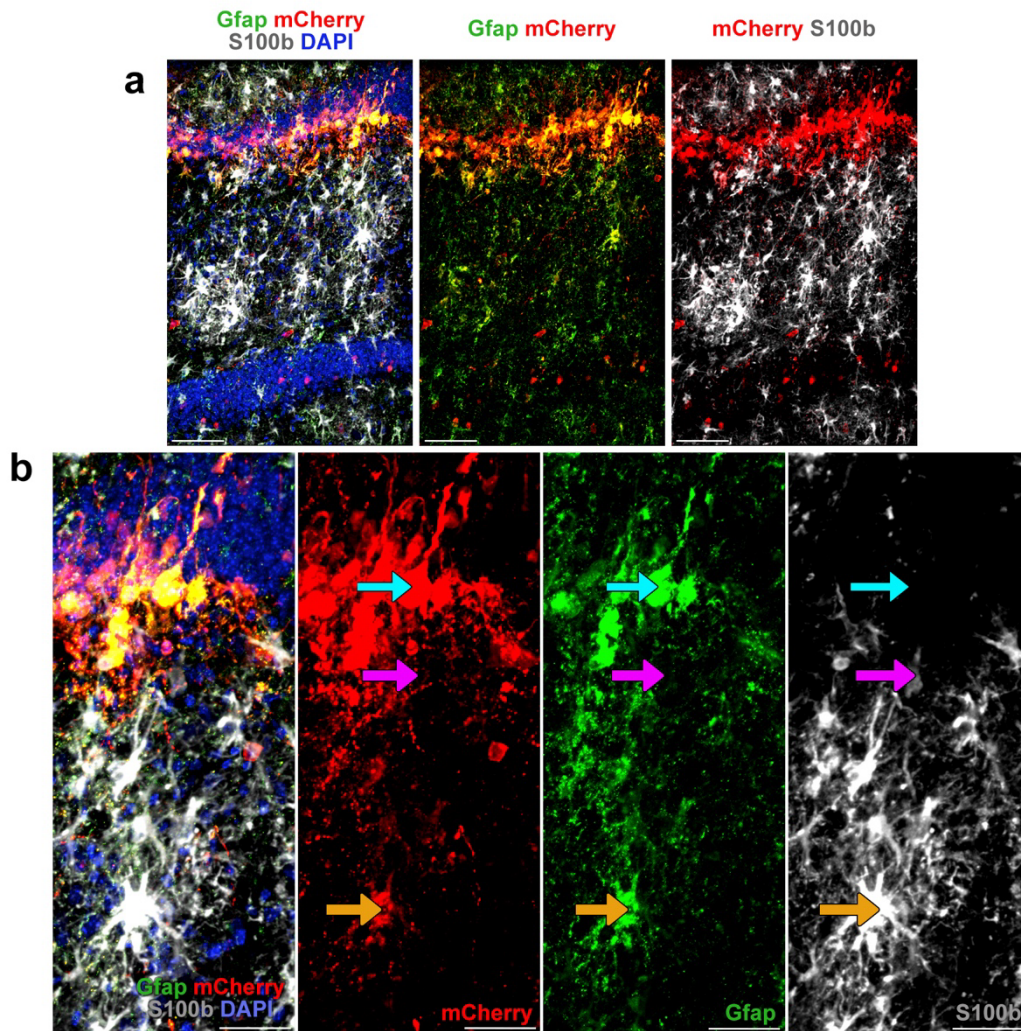

**Supplementary Fig. 3. Ngfr transduction in Gfap<sup>+</sup> astroglia.** **a.** Gfap, mCherry and S100β immunostaining with DAPI counterstain in mouse DG. **b.** Higher magnification images. Cyan arrow: Gfap<sup>+</sup>/S100β<sup>-</sup>/mCherry<sup>+</sup> astroglia, pink arrow: Gfap<sup>-</sup>/S100β<sup>+</sup>/mCherry<sup>-</sup> astroglia, yellow arrow: Gfap<sup>+</sup>/S100β<sup>+</sup>/mCherry<sup>+</sup> astroglia. Scale bars equal 25 μm.

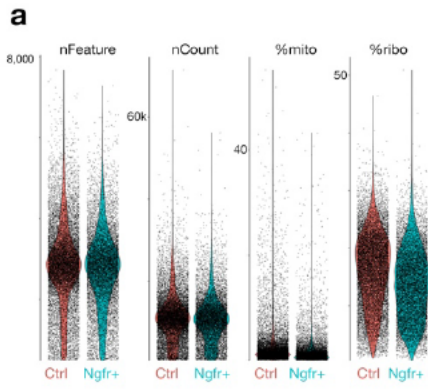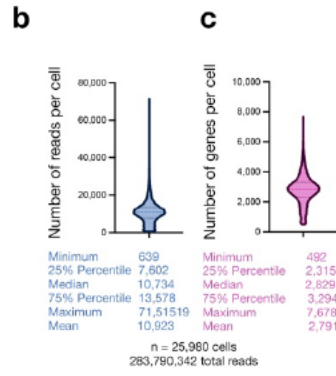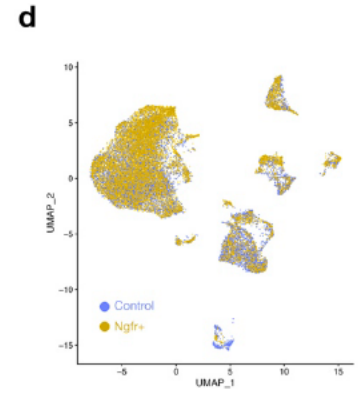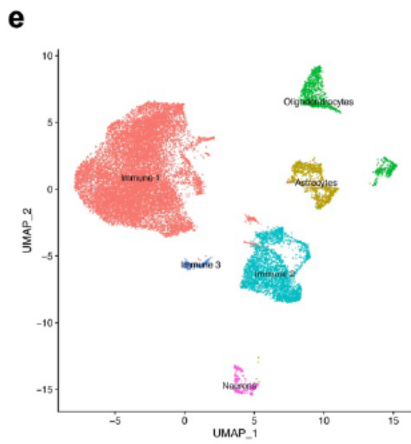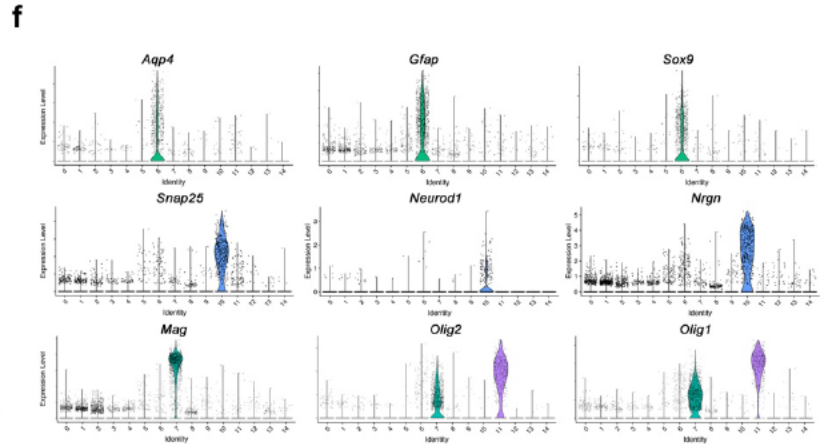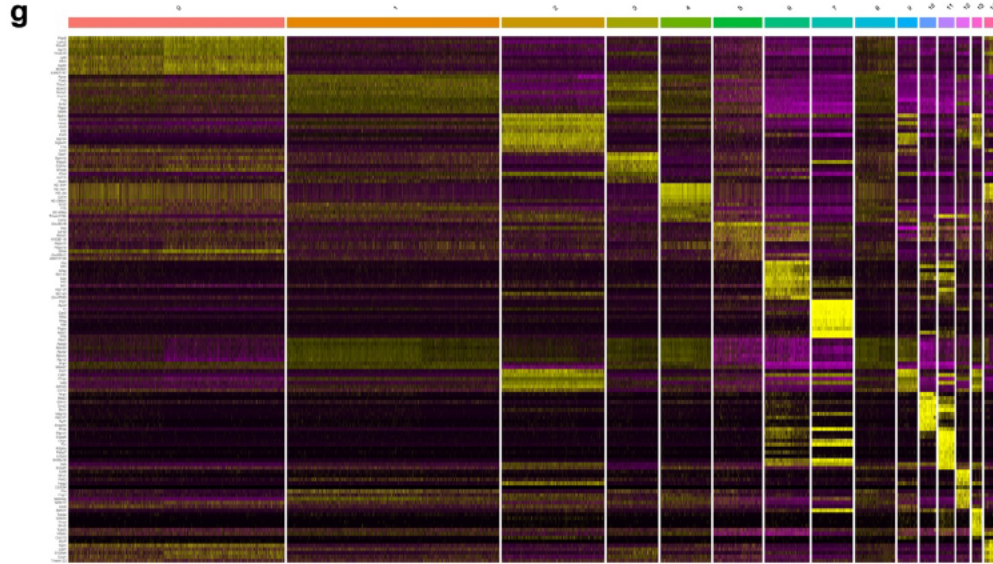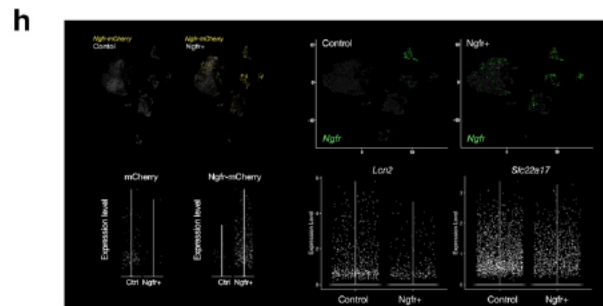

**Supplementary Fig. 4. Single cell transcriptomics sample characteristics and quality control analyses.** **a.** Distribution of number of genes sequenced per cell (nFeature), number of reads per cell (nCount), percentage of mitochondrial gene expression (%mito) and percentage of ribosomal gene expression (%ribo). **b.** Distribution of number of reads per cell. **c.** Distribution of number of genes sequenced per cell. **d.** tSNE plot for control and Lv16-transduced cells. **e.** tSNE plot for individual cell types. **f.** Violin plots for basic cell markers of astroglia, oligodendrocyte, and neurons. **g.** Heatmap for all cell clusters. **h.** Plots for *Ngfr-mCherry* expression in control and Ngfr-transduced hippocampus, *mCherry* and *Ngfr-mCherry* expression in control and Ngfr-transduced mouse DG, total *Ngfr* expression in control and Ngfr-transduced mouse DG, *Lcn2* expression in control and Ngfr-transduced mouse DG, and *Slc22a17* expression in control and Ngfr-transduced mouse DG. Error bars represent standard error of the means.

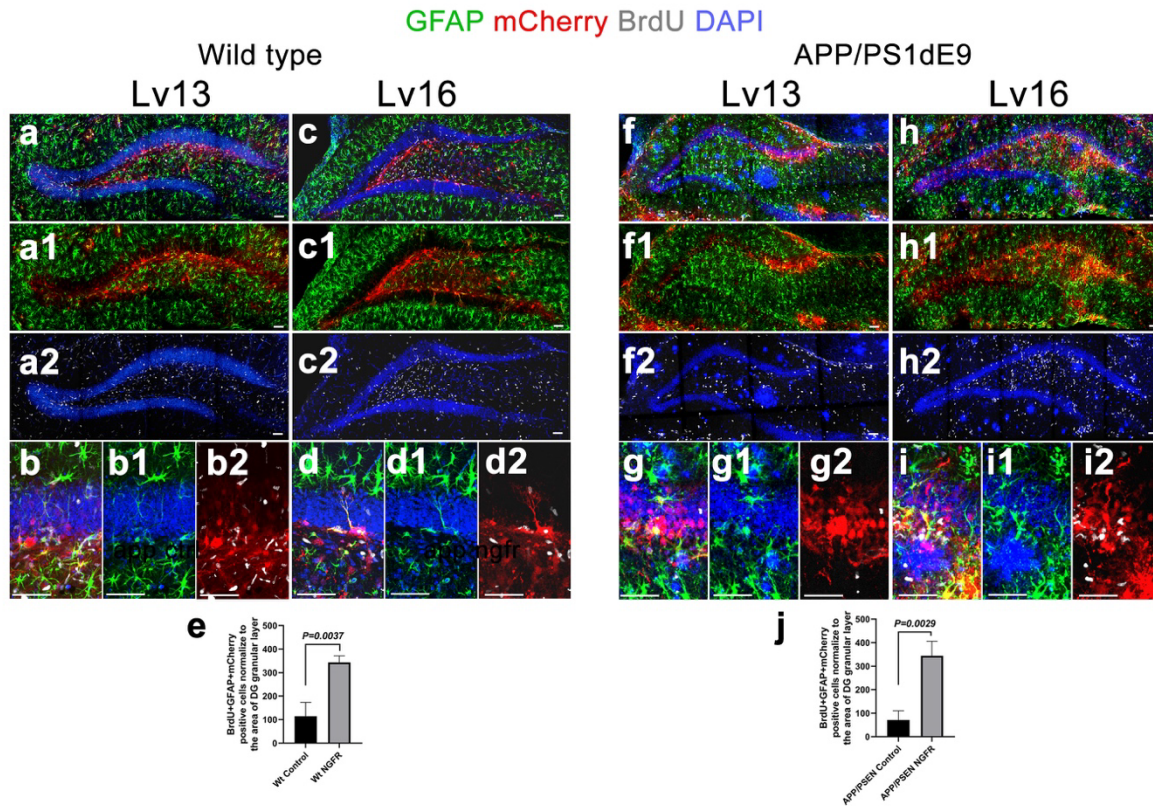

**Supplementary Fig. 5. Lv16 transduction enhances astroglia proliferation in wild type and APP/PS1dE9 mouse model of Alzheimer’s disease.** **a.** GFAP, mCherry, BrdU triple immunostaining with DAPI counterstain in Lv13-transduced wild type mouse dentate gyrus. **a1.** DAPI and BrdU omitted from **a**. **a2.** GFAP and mCherry omitted from **a**. **b.** Higher magnification image of subgranular zone. **b1.** BrdU and mCherry omitted from **b**. **b2.** GFAP and DAPI omitted from **b**. **c.** GFAP, mCherry, BrdU triple immunostaining with DAPI counterstain in Lv16-transduced wild type mouse dentate gyrus. **c1.** DAPI and BrdU omitted from **c**. **c2.** GFAP and mCherry omitted from **c**. **d.** Higher magnification image of subgranular zone. **d1.** BrdU and mCherry omitted from **d**. **d2.** GFAP and DAPI omitted from **d**. **e.** Quantification graph for BrdU-mCherry-GFAP triple positive cells in Lv13 and Lv16-transduced brains. **f.** GFAP, mCherry, BrdU triple immunostaining with DAPI counterstain in Lv13-transduced APP/PS1dE9 mouse dentate gyrus. **f1.** DAPI and BrdU omitted from **f**. **f2.** GFAP and mCherry omitted from **f**. **g.** Higher magnification image of subgranular zone. **g1.** BrdU and mCherry omitted from **g**. **g2.** GFAP and DAPI omitted from **g**. **h.** GFAP, mCherry, BrdU triple immunostaining with DAPI counterstain in Lv16-transduced APP/PS1dE9 mouse dentate gyrus. **(h1)** DAPI and BrdU omitted from **h**. **h2.** GFAP and mCherry omitted from **h**. **i.** Higher magnification image of subgranular zone. **i1.** BrdU and mCherry omitted from **i**. **i2.** GFAP and DAPI omitted from **i**. **j** Quantification graph for BrdU-mCherry-GFAP triple positive cells in Lv13 and Lv16-transduced brains. Scale bars equal 100  $\mu$ m. Error bars represent standard error of the means.

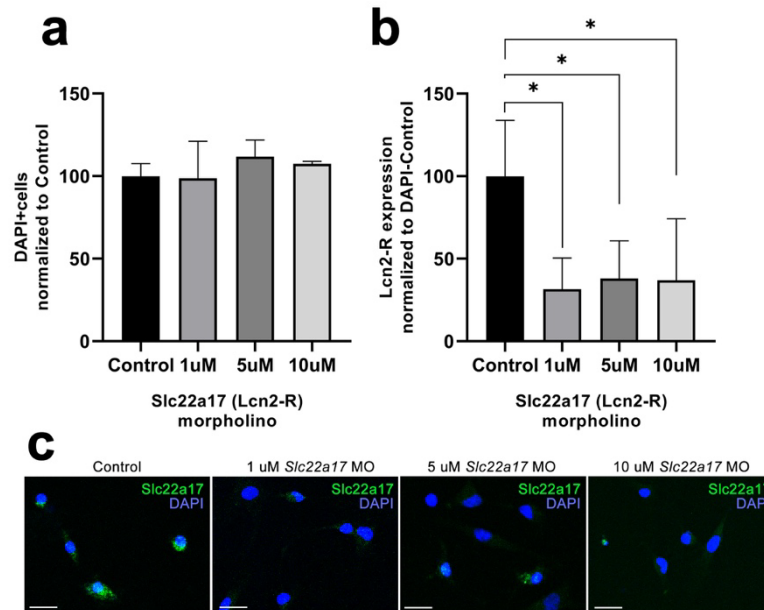

**Supplementary Fig. 6. Effectiveness of *Slc22a17* morpholino.** **a.** In vitro cell viability counts in astroglia that are untransfected or transfected with three doses of *Slc22a17* vivo morpholino (1-, 5- and 10  $\mu$ M). **b.** *Slc22a17* (Lcn2-R) protein expression (fluorescence units on immunolabeled cultures) normalized to DAPI in control and transfected astroglia. **c.** *Slc22a17* immunostaining and DAPI counterstain in control (untransfected) astroglia and astroglia transfected with 1-, 5- and 10  $\mu$ M vivo morpholino. Scale bars equal 25  $\mu$ m. Error bars represent standard error of the means.



**a**

## Data normalization for DSP protein assay

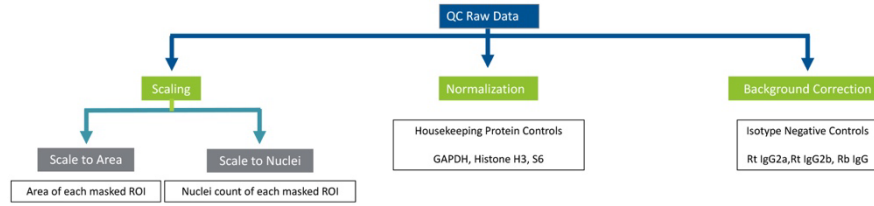**b**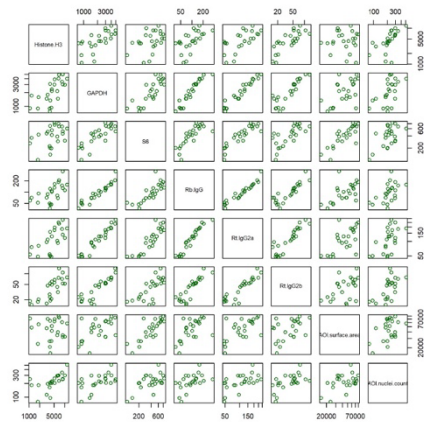**c**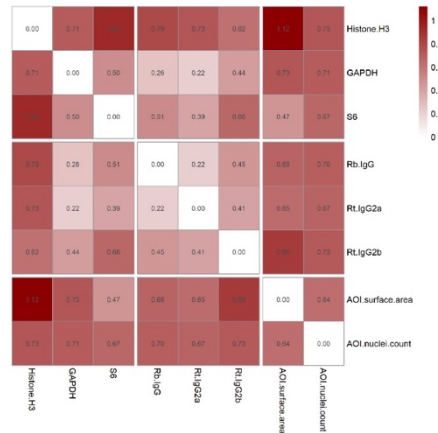**d**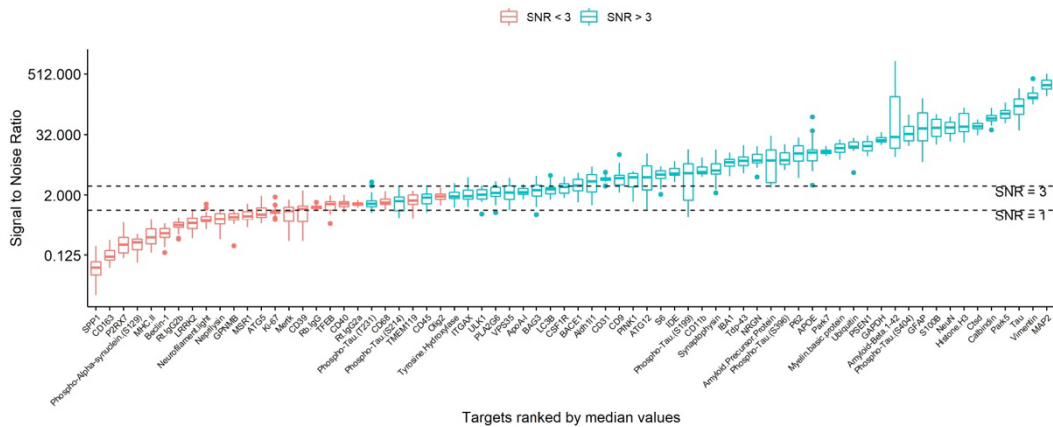

**Supplementary Fig. 7. NanoString GeoMx quality control and normalization strategy. a.** Data normalization options. **b, c.** Pairwise standard deviation analysis. **b.** Raw values plotted for spike-in normalization samples. **c.** Standard deviation heat map for surface area, nuclei count, housekeeping genes (Histone H3, GAPDH, S6) or signal-to-noise ratio (IgG, IgG2a, IgG2b). Signal-to-noise ratio normalization has the lowest standard deviation. **d.** Plot for targets ranked by median expression values normalized to signal-to-noise ratio. Error bars represent standard error of the means.



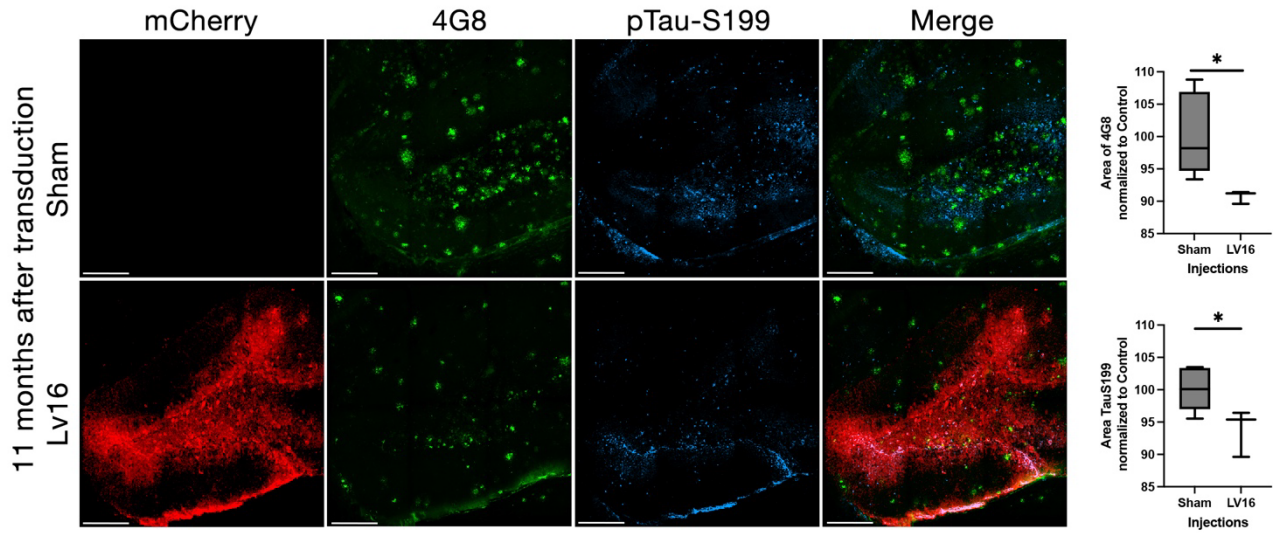

**Supplementary Fig. 9. 11 months after transduction.** APP/PS1dE9 mouse brain section immunostained for 4G8, mCherry and pTau-S199 with DAPI counterstain at 11 months after transduction with Lv16. Quantification graphs for normalized area of 4G8 and pTau-S199. Error bars represent standard error of the means.

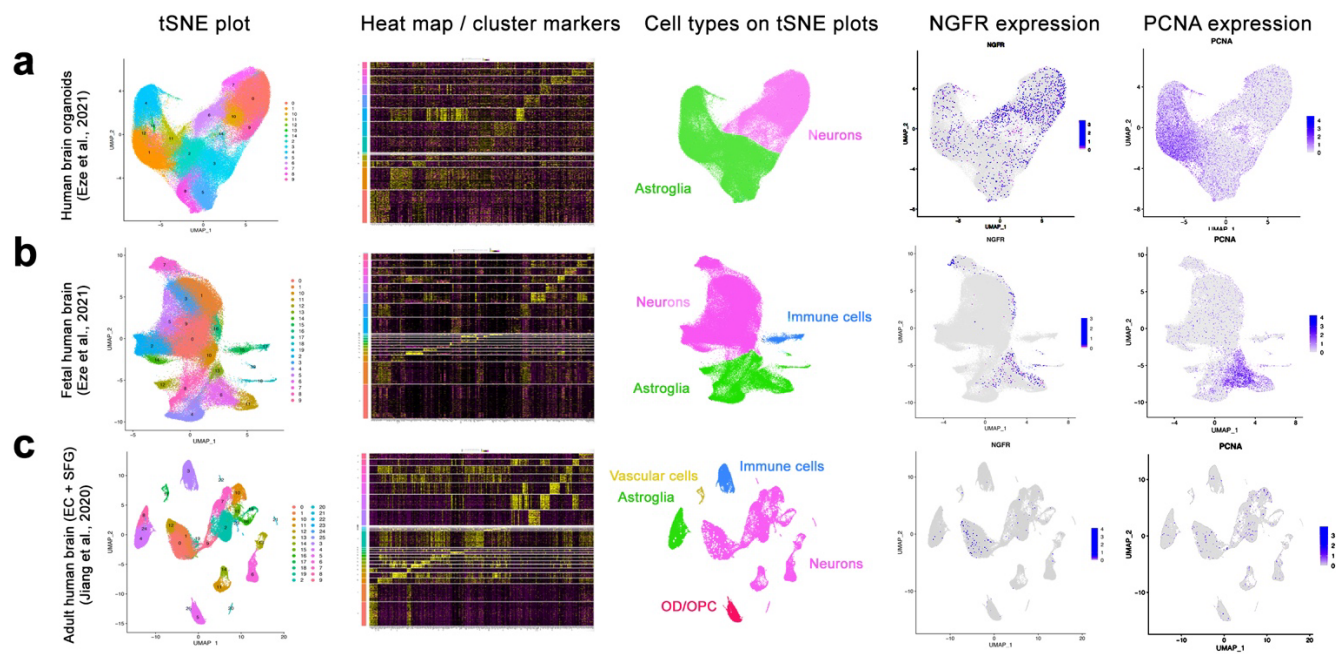

**Supplementary Fig. 10. Single cell sequencing analyses of human brain organoids, fetal and adult human brains.** tSNE plots for cell clustering, heat maps of top marker genes, identified cell types on colored tSNE plots, tSNE plot for *NGFR* and *PCNA* are shown for human datasets of **a.** human brain organoids, **b.** fetal human brain, and **(c)** adult human brain entorhinal cortex (EC) and superior frontal gyrus (SFG).

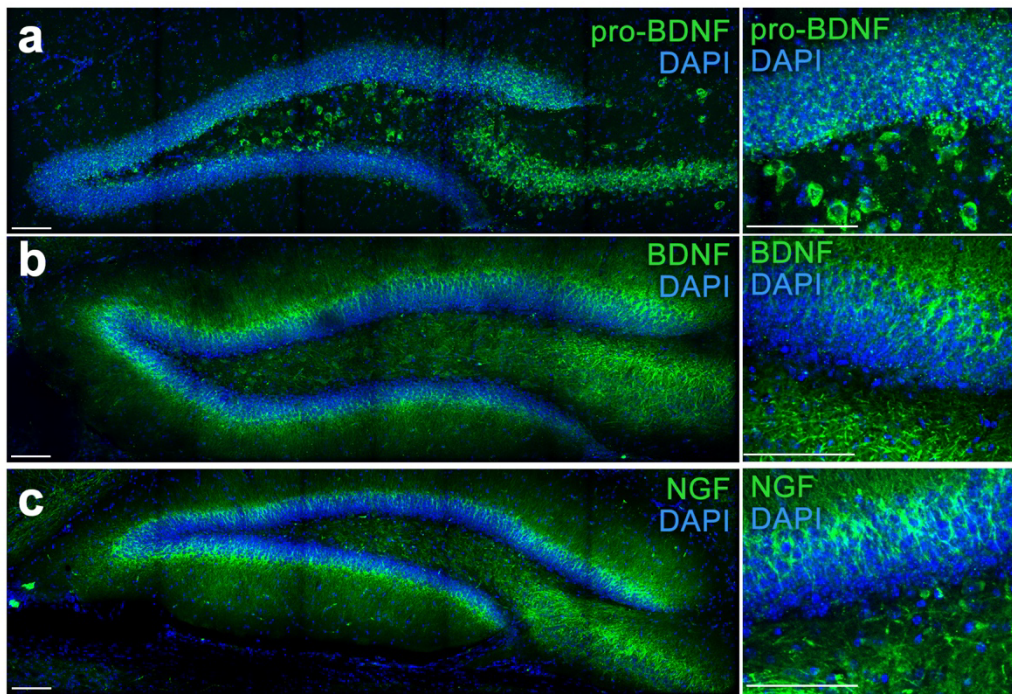

**Supplementary Fig. 11. Expression of Ngfr ligands in mouse hippocampus. a-c.** Expression of pro-BDNF, BDNF and NGF in mouse dentate gyrus. Panels on the right are high magnification from left panels. **a.** pro-BDNF, **b.** BDNF, **c.** NGF. BDNF and NGF are expressed in outer layers of DG, while pro-BDNF is expressed in the subgranular zone and hilus. Scale bars equal 25  $\mu$ m.

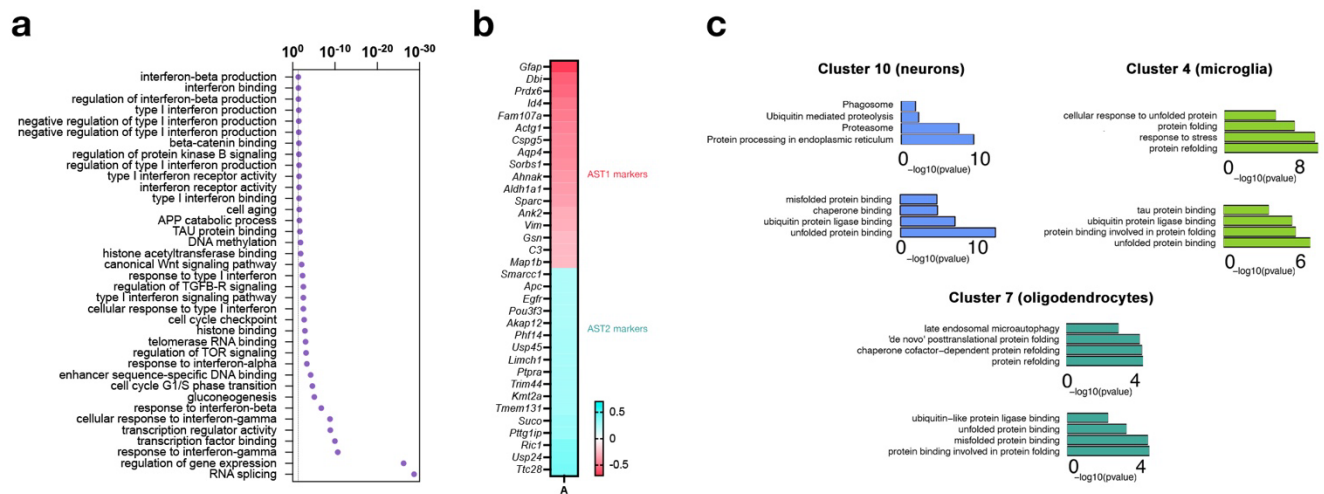

**Supplementary Fig. 12. Potential mechanism of action downstream to Ngfr signalling.** **a.** Enriched GO-terms after Ngfr signalling in astroglia in mouse DG. Interferon signalling-related terms are enriched. **b.** Heatmap of changes of genes associated with human reactive astroglia (AST1) and astroglia with neural progenitor activity (AST2). Ngfr reduces reactive astrocyte markers while increasing the progenitor cell markers. **c.** Differentially expressed genes after *Ngfr* transduction enrich the pathways related to enhanced protein quality control, toxic protein removal, misfolded protein response in non-neuronal cells. Selected GO-terms and KEGG pathways are depicted.

- **Supplementary Tables**

**Supplementary Table 1.** All materials and reagents used in this study. Provided online as .xlsx file.

**Supplementary Table 2.** Demographics of human brain samples used in this study. Provided online as .xlsx file.

- **Supplementary Data**

**Supplementary Data 1.** Differentially expressed genes in cell clusters of mouse brain after transduction of *Ngfr*. Provided online as .xlsx file.

**Supplementary Data 2.** KEGG pathway and GO term analyses on the genes that are downregulated in Cluster 6 (astroglia) after Lv16 transduction compared to control. Provided online as .xlsx file.

**Supplementary Data 3.** KEGG pathway and GO term analyses on the genes that are upregulated in Cluster 6 (astroglia) after Lv16 transduction compared to control. Provided online as .xlsx file.

**Supplementary Data 4.** All raw data that is used for statistical calculations. Tabs indicate figure panels. Provided online as .xlsx file.

**Supplementary Data 5.** Differential gene expression in astrocytes that are transduced with *Ngfr* virus versus non-transduced. Provided online as .xlsx file.

**Supplementary Data 6.** Differential gene expression in astrocytes that are transduced with *Ngfr* virus versus transduced with control virus. Provided online as .xlsx file.

**Supplementary Data 7.** Nanostring GeoMX spatial proteomics neuro panel raw data. Provided online as .xlsx file.

**Supplementary Data 8.** Nanostring GeoMX spatial proteomics immune panel raw data Provided online as .xlsx file.

**Supplementary Data 9.** Comparison of Data S6 to human ROSMAP AD cohort and zebrafish. Provided online as .xlsx file.

**Supplementary Data 10.** Significant differential gene expression (DGE) (FDR < 0.05) in the AMP-AD datasets; CellCODE, PSEA, WLC analyses for cell intrinsic DGE from 3 different datasets (Mayo, MSSM, ROSMAP); WGCNA networks constructed from Mayo CER and TCX dataset. Provided online as .xlsx file.
